# Supplementary material
Source: PubMed Central journal article supplement (PMC4248700)
Supplement: EC.00183-14_zek999094360so1.pdf [file EC.00183-14_zek999094360so1.pdf]

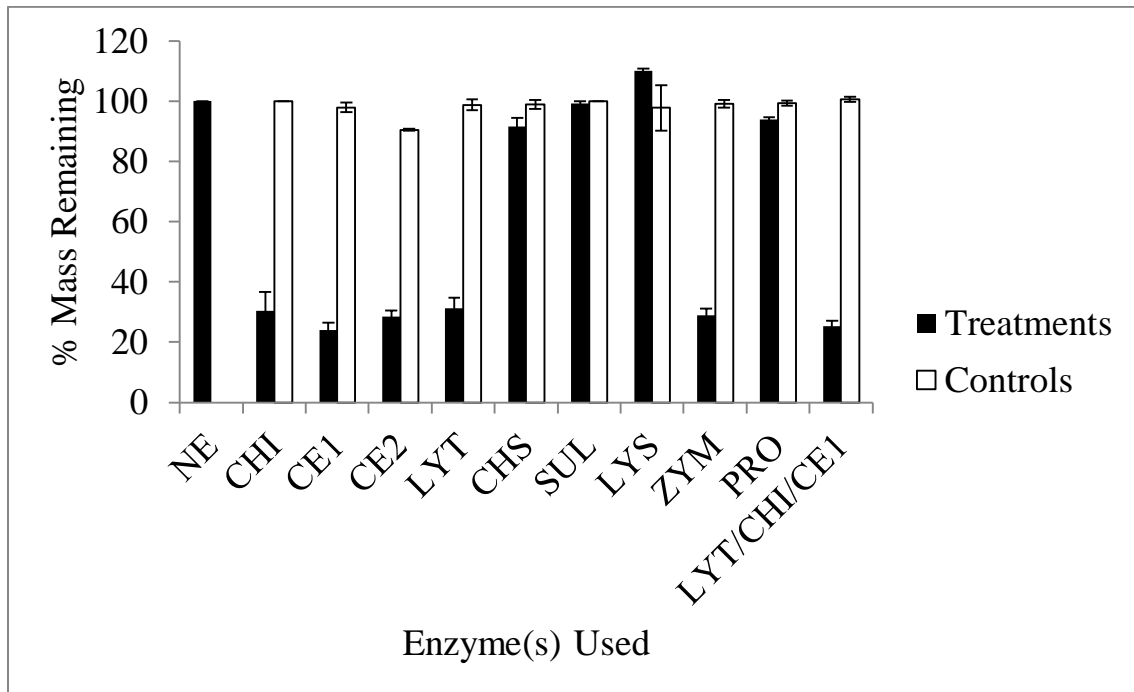

**FIG S1** Mass loss from enzymatic digestions of *N. gaditana* cell walls. All values are means ( $n = 3$ )  $\pm$  1 SD. NE = no enzyme; CHI = chitinase, CE1 = cellulase #1; CE2 = cellulase #2; LYT = lyticase; CHS = chitosanase; SUL = sulfatase; LYS = lysozyme; ZYM = zymolyase; PRO = protease. Controls used heat denatured enzyme.





**TABLE S1.** Accession Numbers for proteins used in CESA/CSL phylogenetic tree (Fig. 1)

| <b>NCBI Accession/<br/>Gene Model<sup>a</sup></b> | <b>Description</b>                                   | <b>Organism</b>                          |
|---------------------------------------------------|------------------------------------------------------|------------------------------------------|
| ABT16312.1                                        | hypothetical protein                                 | Acanthocystis turfacea Chlorella virus 1 |
| ABT16551.1                                        | hypothetical protein                                 | Acanthocystis turfacea Chlorella virus 1 |
| ABT16957.1                                        | hypothetical protein                                 | Acanthocystis turfacea Chlorella virus 1 |
| AAD20440.2                                        | putative beta 13 glucan synthase catalytic subunit   | Agrobacterium sp. ATCC 31749             |
| ABA21191.1                                        | cellulose synthase catalytic subunit                 | Anabaena variabilis ATCC 29413           |
| NP_180821.1                                       | cellulose synthase-like protein B2                   | Arabidopsis thaliana                     |
| NP_180869.1                                       | cellulose synthase-like protein D1                   | Arabidopsis thaliana                     |
| NP_195645.1                                       | cellulose synthase A catalytic subunit 2 UDP-forming | Arabidopsis thaliana                     |
| NP_194887.1                                       | cellulose-synthase-like C5                           | Arabidopsis thaliana                     |
| NP_194967.1                                       | cellulose synthase A catalytic subunit 1 UDP-forming | Arabidopsis thaliana                     |
| NP_197193.1                                       | cellulose synthase-like protein D2                   | Arabidopsis thaliana                     |
| NP_197666.1                                       | glucomannan 4-beta-mannosyltransferase 2             | Arabidopsis thaliana                     |
| NP_566835.1                                       | xyloglucan glycosyltransferase 4                     | Arabidopsis thaliana                     |
| NP_175981.2                                       | cellulose synthase-like protein E1                   | Arabidopsis thaliana                     |
| NP_567692.2                                       | cellulose synthase-like protein G2                   | Arabidopsis thaliana                     |
| NP_180820.2                                       | cellulose synthase-like protein B1                   | Arabidopsis thaliana                     |
| NP_197123.3                                       | cellulose synthase like A11                          | Arabidopsis thaliana                     |
| NP_194132.3                                       | cellulose synthase-like protein G1                   | Arabidopsis thaliana                     |
| EAQ91514.1                                        | conserved hypothetical protein                       | Chaetomium globosum CBS 148.51           |
| XP_005715589.1                                    | Cellulose synthase (UDP-forming) family GT2          | Chondrus crispus                         |
| XP_005711952.1                                    | Cellulose synthase (UDP-forming) family GT2          | Chondrus crispus                         |
| Esi0004_0105                                      | CESA                                                 | Ectocarpus salacius                      |
| Esi0120_0014                                      | CESA                                                 | Ectocarpus salacius                      |
| Esi0231_0017                                      | CESA                                                 | Ectocarpus salacius                      |
| Esi0231_0020                                      | CESA                                                 | Ectocarpus salacius                      |
| Esi0097_0013                                      | CSL                                                  | Ectocarpus salacius                      |
| Esi0097_0016                                      | CSL                                                  | Ectocarpus salacius                      |
| Esi0097_0024                                      | CSL                                                  | Ectocarpus salacius                      |
| Esi0185_0053                                      | CSL                                                  | Ectocarpus salacius                      |
| Esi0200_0018                                      | CSL                                                  | Ectocarpus salacius                      |
| WP_001413335.1                                    | cellulose synthase                                   | Escherichia coli                         |
| ZP_01440894.1                                     | beta 13 glucan synthase catalytic subunit            | Fulvimarina pelagi HTCC2506              |
| ACI89427.1                                        | cellulose synthase subunit A                         | Gluconacetobacter xylinus                |
| EDX74293.1                                        | Cellulose synthase superfamily                       | Microcoleus chthonoplastes PCC 7420      |
| JU963065                                          | CESA1                                                | Nannochloropsis gaditana CCMP526         |
| JU963444                                          | CESA2                                                | Nannochloropsis gaditana CCMP526         |
| JU981242                                          | CESA3                                                | Nannochloropsis gaditana CCMP526         |
| JU963368                                          | CESA4                                                | Nannochloropsis gaditana CCMP526         |
| NannoCCMP-1779_7935-mRNA-1                        | CESA1                                                | Nannochloropsis oceanica CCMP1779        |

|                            |                                                  |                                           |
|----------------------------|--------------------------------------------------|-------------------------------------------|
| NannoCCMP-1779_5780-mRNA-1 | CESA2                                            | Nannochloropsis oceanica CCMP1779         |
| NannoCCMP-1779_6440-mRNA-1 | CESA3                                            | Nannochloropsis oceanica CCMP1779         |
| EAA30080.3                 | hypothetical protein NCU08226                    | Neurospora crassa OR74A                   |
| ACC80169.1                 | cellulose synthase                               | Nostoc punctiforme PCC 73102              |
| AAL25130.1                 | cellulose synthase-like protein OsCslE2          | Oryza sativa                              |
| DAA01753.1                 | TPA exp: cellulose synthase-like D2              | Oryza sativa Japonica Group               |
| BAD33978.1                 | putative cellulose synthase-like protein OsCslE1 | Oryza sativa Japonica Group               |
| BAA82375.1                 | Similar to glycogenin glucosyltransferase        | Oryza sativa Japonica Group               |
| AAC39333.1                 | RSW1-like cellulose synthase catalytic subunit   | Oryza sativa Japonica Group               |
| AAL25131.1                 | cellulose synthase-like protein OsCslF1          | Oryza sativa Japonica Group               |
| AAL25132.1                 | cellulose synthase-like protein OsCslF2          | Oryza sativa Japonica Group               |
| AAL38525.1                 | CSLA2                                            | Oryza sativa Japonica Group               |
| BAC10759.1                 | putative CSLC9                                   | Oryza sativa Japonica Group               |
| AAP21426.1                 | putative cellulose synthase catalytic subunit    | Oryza sativa Japonica Group               |
| DAA01752.1                 | TPA exp: cellulose synthase-like D1              | Oryza sativa Japonica Group               |
| BAC98512.1                 | putative glucosyltransferase                     | Oryza sativa Japonica Group               |
| BAF26298.1                 | Os10g0341700                                     | Oryza sativa Japonica Group               |
| BAF14725.2                 | Os04g0429500                                     | Oryza sativa Japonica Group               |
| CAL57811.1                 | unnamed protein product                          | Ostreococcus tauri OTTH0595               |
| ABT13740.1                 | hypothetical protein                             | Paramecium bursaria chlorella virus MT325 |
| ABP96902.1                 | cellulose synthase 1                             | Phytophthora infestans                    |
| ABP96903.1                 | cellulose synthase 2                             | Phytophthora infestans                    |
| ABP96904.1                 | cellulose synthase 3                             | Phytophthora infestans                    |
| ABP96905.1                 | cellulose synthase 4                             | Phytophthora infestans                    |
| XP_001907680.1             | hypothetical protein                             | Podospora anserina                        |
| ABX71734.1                 | cellulose synthase                               | Porphyra yezoensis                        |
| ACX56230.1                 | cellulose synthase 2                             | Saprolegnia monoica                       |
| ACX56231.1                 | cellulose synthase 3                             | Saprolegnia monoica                       |
| ACX56232.1                 | cellulose synthase 4                             | Saprolegnia monoica                       |
| EDY42701.1                 | cellulose synthase                               | Streptomyces sp. SPB74                    |
| ACB00100.1                 | cellulose synthase catalytic subunit             | Synechococcus sp. PCC 7002                |
| WP_016266338.1             | cellulose synthase catalytic subunit partial     | Yersinia enterocolitica                   |

<sup>a</sup> NCBI accession numbers are listed for all organisms except for *Ectocarpus salacicus* and *Nannochloropsis oceanica*. NCBI TSA accession listed for *Nannochloropsis gaditana*.

**TABLE S2** Enzymatic release of monomeric sugars from the *N. gaditana* cell wall.

| <b>Enzyme</b> | <b>% Monomeric Carb<sup>a</sup></b> | <b>% as Glucose<sup>b</sup></b> | <b>Other Monomers Detected</b> |
|---------------|-------------------------------------|---------------------------------|--------------------------------|
| Cellulase #1  | 27.9 ± 4.5                          | 99.8                            | Fuc, Man, Rha                  |
| Lyticase      | 6.5 ± 0.1                           | 100                             | none                           |
| Zymolyase     | 1.2 ± 0.4                           | 100                             | none                           |

<sup>a</sup> Enzymatically released monomeric carbohydrates are expressed as a percentage of total carbohydrates (n = 3 ± 1 SD) using HPAEC-PAD.

<sup>b</sup> TFA digestion of the enzyme hydrolysate was used to calculate the percent of the carbohydrate that was glucose (n = 3, standard deviations were all < 0.05%).

**TABLE S3** Pairwise sequence identity of *Nannochloropsis* CESA.<sup>a</sup>

|                    |                    | <i>N. gaditana</i> |       |       |       | <i>N. oceanica</i> |       |                    |       |
|--------------------|--------------------|--------------------|-------|-------|-------|--------------------|-------|--------------------|-------|
|                    |                    | CESA1              | CESA2 | CESA3 | CESA4 | CESA1              | CESA2 | CESA3 <sup>b</sup> | CESA4 |
| <i>N. oceanica</i> | CESA1              | 80.3               | 42.1  | 17.7  | 15.4  | 100                | 41.3  | NA                 | 14.8  |
|                    | CESA2              | 41.3               | 86    | 16.4  | 14.4  |                    | 100   | NA                 | 12.9  |
|                    | CESA3 <sup>b</sup> | NA                 | NA    | NA    | NA    |                    |       | NA                 | NA    |
|                    | CESA4              | 14.9               | 13.9  | 29.7  | 73.3  |                    |       |                    | 100   |
| <i>N. gaditana</i> | CESA1              | 100                |       |       |       |                    |       |                    |       |
|                    | CESA2              | 42.5               | 100   |       |       |                    |       |                    |       |
|                    | CESA3              | 15.4               | 16.1  | 100   |       |                    |       |                    |       |
|                    | CESA4              | 16.2               | 15.4  | 31.3  | 100   |                    |       |                    |       |

<sup>a</sup> Values given as percent of residues identical between given proteins. Light grey indicates a comparison between clades, Clade 1: CESA1 and CESA2; Clade 2: CESA3 and CESA4.

<sup>b</sup> CESA3 from *N. oceanica* sequence was not available.

**TABLE S4** ICP-AES analysis of *N. gaditana* cell wall material.<sup>a</sup>

| Analyte <sup>b</sup> | f/2 #1               | f/2 #2             | ASW #1 <sup>c</sup> | ASW #1 <sup>c</sup> | ASW #2             |
|----------------------|----------------------|--------------------|---------------------|---------------------|--------------------|
| Ag 328.068           | BDL                  | BDL                | BDL                 | BDL                 | BDL                |
| Al 308.215           | 0.010 <sup>d</sup>   | 0.011 <sup>d</sup> | 0.001 <sup>d</sup>  | 0.010 <sup>d</sup>  | 0.005 <sup>d</sup> |
| As 188.979           | 0.001                | 0.001              | BDL                 | BDL                 | BDL                |
| B 249.772            | 0.017                | 0.016              | BDL                 | BDL                 | 0.003              |
| Ba 233.527           | 0.043                | 0.044              | 0.010               | 0.047               | 0.005              |
| Be 313.107           | 0.000                | 0.000              | BDL                 | BDL                 | BDL                |
| Ca 315.887           | 0.078                | 0.049              | 0.187               | 0.441               | 0.165              |
| Cd 214.440           | 0.002                | 0.009              | BDL                 | BDL                 | 0.004              |
| Co 228.616           | BDL                  | BDL                | BDL                 | BDL                 | 0.004              |
| Cr 205.560           | 0.003                | 0.003              | 0.000               | 0.000               | 0.000              |
| Cu 324.752           | 0.002                | 0.001              | 0.000               | 0.001               | 0.000              |
| Fe 238.204           | 0.023                | 0.014              | 0.028               | 0.059               | 0.030              |
| K 766.490            | 0.065                | 0.060              | 0.020               | 0.083               | 0.011              |
| Li 670.784           | 0.001                | 0.000              | BDL                 | BDL                 | BDL                |
| Mg 279.553           | 0.021                | 0.013              | 0.070               | 0.100               | 0.132              |
| Mn 257.610           | 0.003                | 0.002              | 0.000               | 0.001               | 0.001              |
| Na 589.592           | 0.197                | 0.171              | 0.054               | 0.268               | 0.672              |
| Ni 231.604           | 0.007                | 0.001              | 0.000               | 0.000               | 0.004              |
| P 177.434            | 0.011                | 0.009              | 0.053               | 0.082               | 0.042              |
| Pb 220.353           | 0.002                | 0.001              | BDL                 | BDL                 | BDL                |
| S 180.669            | 0.273                | 0.199              | 0.328               | 0.509               | 0.845              |
| Se 196.026           | 0.002                | 0.004              | BDL                 | BDL                 | BDL                |
| Si 251.611           | BDL                  | BDL                | BDL                 | BDL                 | 0.001              |
| Sr 407.771           | 0.001                | 0.001              | 0.002               | 0.003               | 0.000              |
| Tl 190.801           | 0.001                | 0.001              | BDL                 | BDL                 | BDL                |
| V 292.402            | 0.001                | 0.000              | BDL                 | BDL                 | BDL                |
| Zn 213.857           | 0.032                | 0.031              | 0.009               | 0.039               | 0.011              |
| Sn 189.927           | BDL                  | BDL                | BDL                 | BDL                 | BDL                |
| Mo 202.031           | 0.002                | 0.001              | BDL                 | BDL                 | BDL                |
| Sb 217.582           | BDL                  | BDL                | BDL                 | BDL                 | BDL                |
| Ti 334.940           | 0.000                | 0.002              | BDL                 | BDL                 | BDL                |
| <b>Total</b>         | <b>0.797</b>         | <b>0.641</b>       | <b>0.762</b>        | <b>1.643</b>        | <b>1.936</b>       |
| <b>Average</b>       | <b>1.144 ± 0.578</b> |                    |                     |                     |                    |

<sup>a</sup> All values are presented as % m/m of the wall prep.

<sup>b</sup> Numbers after element names refer to emission wavelengths.

<sup>c</sup> Two technical replicates are provided for the ASW #1 prep. Error expressed as ± 1 SD.

<sup>d</sup> Aluminum numbers likely reflect aluminum foil contamination during processing.
